# Supplementary material
Source: PubMed Central journal article supplement (PMC8885792)
Supplement: NIHMS1749271-supplement-supplemental_figure.pdf [file NIHMS1749271-supplement-supplemental_figure.pdf]

Low intrinsic efficacy alone cannot explain the improved side effect profiles of new opioid agonists

Edward L. Stahl and Laura M. Bohn

Department of Molecular Medicine, The Scripps Research Institute, 130 Scripps Way, Jupiter, FL, 33458

[estahl@scripps.edu](mailto:estahl@scripps.edu); [lbohn@scripps.edu](mailto:lbohn@scripps.edu)

Supplemental Figure 1. Simulation of curves from  $EC_{50}$  and  $E_{max}$  values.

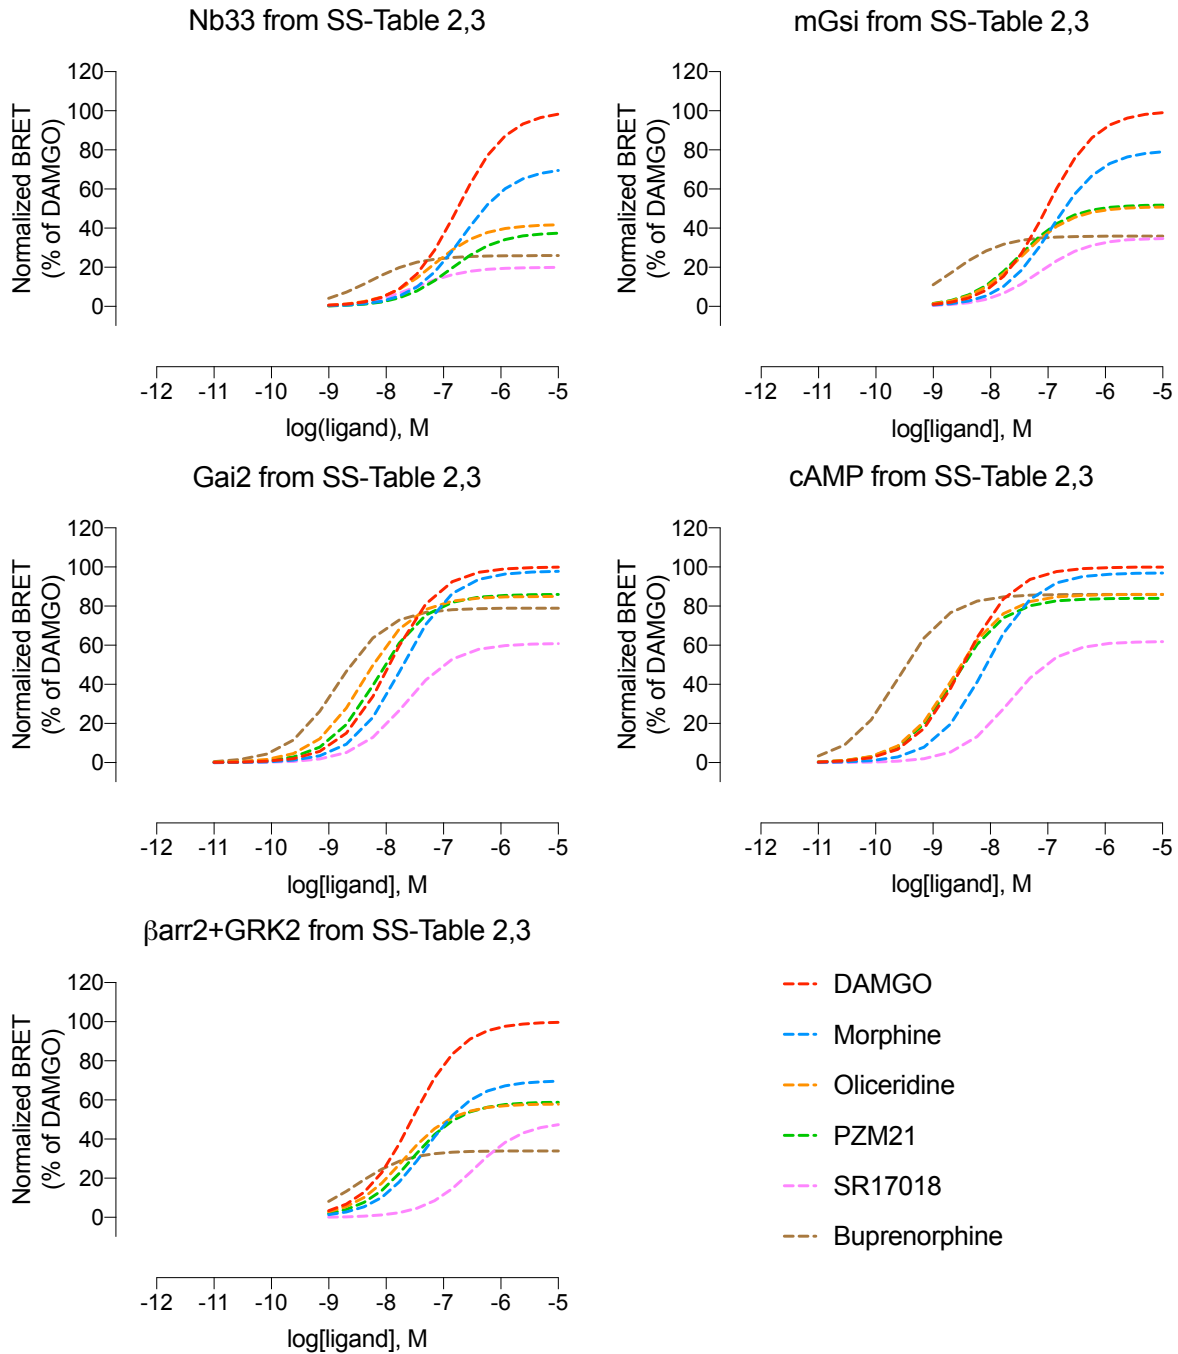

**Supplemental Figure 1.** Simulated concentration response curves generated from SS-Table 2 and SS-Table 3 parameters using 3 parameter nonlinear regression, GraphPad Prism 9.
